# Supplementary material for: LncRNA MIR100HG promotes cell proliferation in triple-negative breast cancer through triplex formation with p27 loci
Source: PubMed Central journal article supplement (PMC6057987; doi:10.1038/s41419-018-0869-2), 2018-07-24

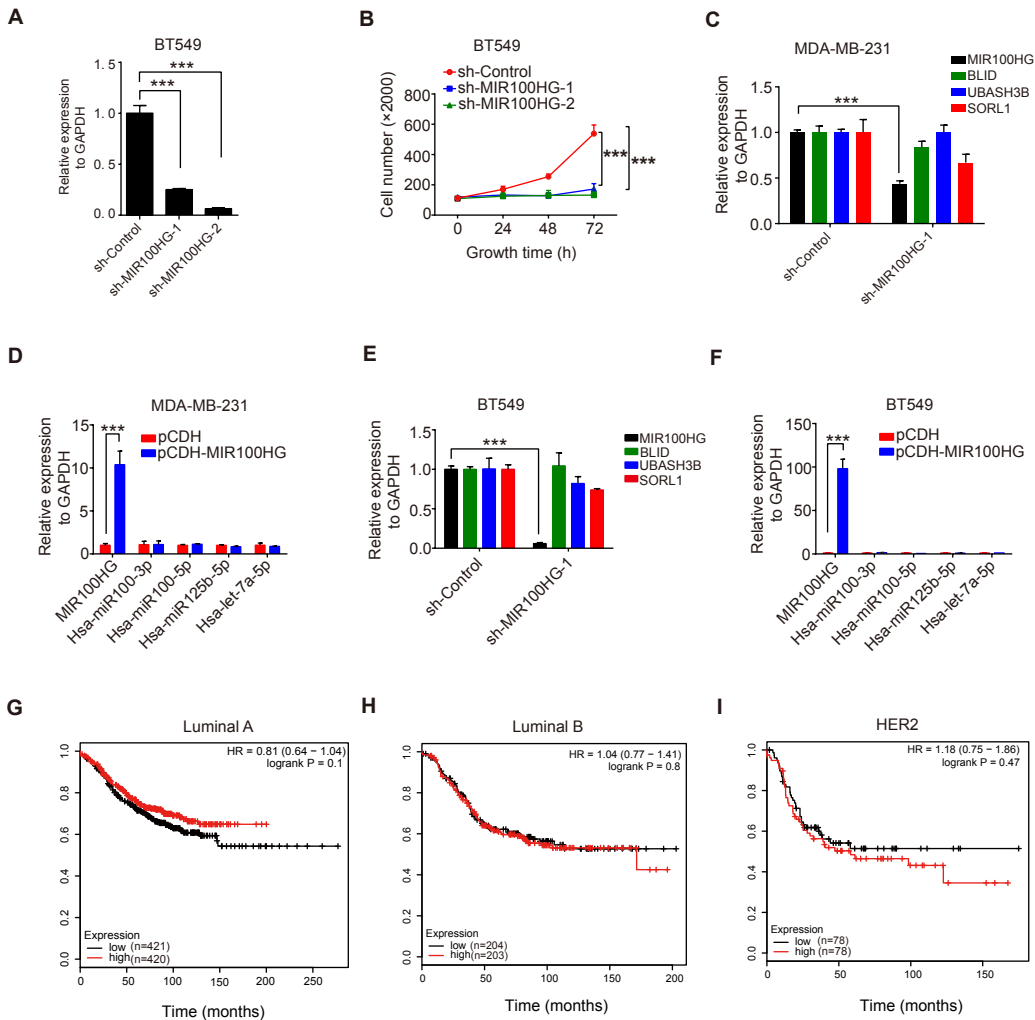

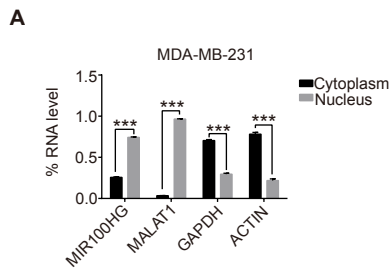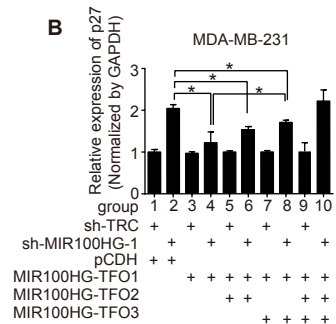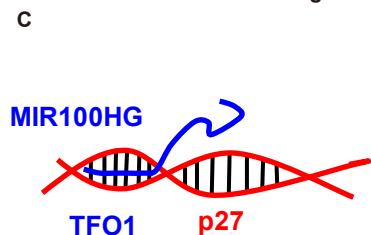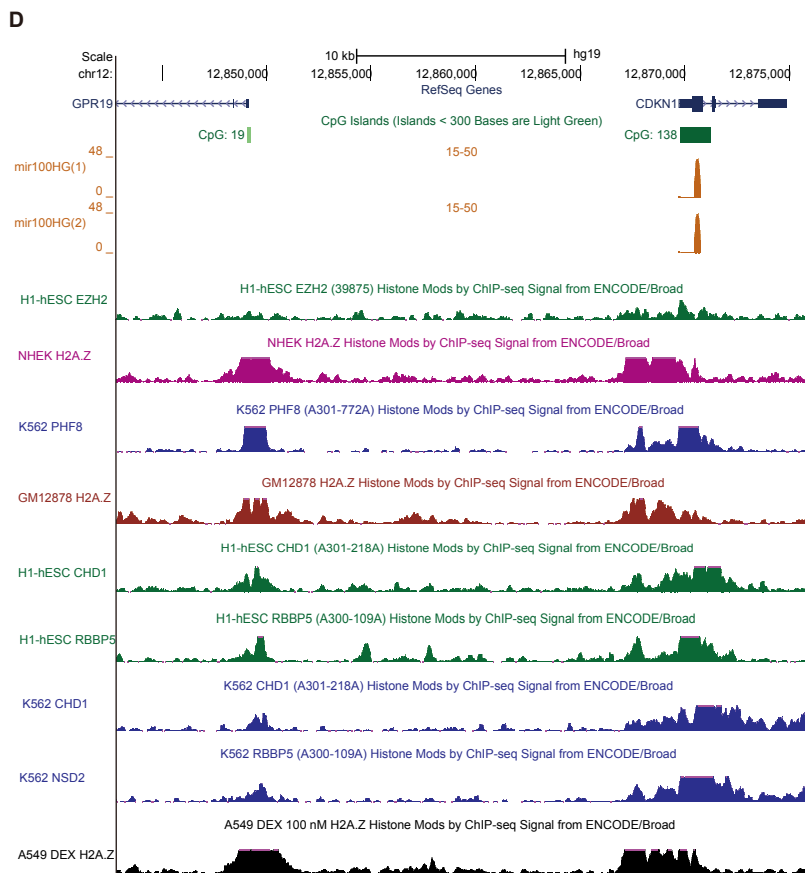

Supplement: 41419_2018_869_MOESM2_ESM.pdf [file 41419_2018_869_MOESM2_ESM.pdf]
